# Supplementary material for: Factors of influence in prisoner’s dilemma task: a review of medical literature
Source: PeerJ journal article supplement (doi:10.7717/peerj.12829), 2022-01-28
Supplement: tableA_final_refs_VK_revised.pdf [file tableA_final_refs_VK_revised.pdf]

| reference No.                      | parties' composition |             |                    |            | opponent perceived type    |            |      | interaction flow type |          |            |          | instructions               |                           | opponents                                              | rounds                                                    | strategy           |                     |                   |                   |                             |                  | reward matrix    | comments |                                                                                                                                                                                           |                                                                      |                                                                                                                                                                      |
|------------------------------------|----------------------|-------------|--------------------|------------|----------------------------|------------|------|-----------------------|----------|------------|----------|----------------------------|---------------------------|--------------------------------------------------------|-----------------------------------------------------------|--------------------|---------------------|-------------------|-------------------|-----------------------------|------------------|------------------|----------|-------------------------------------------------------------------------------------------------------------------------------------------------------------------------------------------|----------------------------------------------------------------------|----------------------------------------------------------------------------------------------------------------------------------------------------------------------|
|                                    | group                | multiplayer | individual         |            | algorithm,predefined       |            | real | simultaneous          |          | sequential |          | narration/rules            | options                   |                                                        |                                                           | tft <sup>[1]</sup> | wsls <sup>[2]</sup> | ac <sup>[3]</sup> | ad <sup>[4]</sup> | random /half <sup>[5]</sup> | other            |                  |          |                                                                                                                                                                                           |                                                                      |                                                                                                                                                                      |
|                                    |                      |             | neighbours (links) | individual | non-human/pc               | human      |      | one-shot              | iterated | one-shot   | iterated |                            |                           |                                                        |                                                           |                    |                     |                   |                   |                             |                  |                  |          |                                                                                                                                                                                           |                                                                      |                                                                                                                                                                      |
|                                    |                      |             |                    |            | unknown, told non-human/pc | told human |      |                       |          |            |          |                            |                           |                                                        |                                                           |                    |                     |                   |                   |                             |                  |                  |          | [1]Tft: tit-for-tat [2]wsls: win-stay-lose-swift [3]ac: Always Cooperate [4]ad: Always Defect [5]random: 50% of cooperation or defection, half: cooperate or defect in half of the rounds |                                                                      |                                                                                                                                                                      |
|                                    |                      |             |                    |            |                            |            |      |                       |          |            |          |                            |                           |                                                        |                                                           |                    |                     |                   |                   |                             |                  |                  |          |                                                                                                                                                                                           |                                                                      |                                                                                                                                                                      |
| Kumar et al., 2021                 |                      |             |                    | x          |                            |            | x    |                       | x        |            |          | matrix                     | transfer/keep             | 4                                                      | 1                                                         |                    |                     |                   |                   |                             |                  |                  |          | 6/4/2/0                                                                                                                                                                                   |                                                                      |                                                                                                                                                                      |
| Zhang et al., 2020                 |                      |             |                    | x          |                            | x          |      |                       | x        |            |          |                            | red/black                 | 1                                                      | 60                                                        | x                  |                     |                   |                   |                             |                  |                  |          |                                                                                                                                                                                           | 10/7/0/0/, 10/3/0/0                                                  |                                                                                                                                                                      |
| Cervantes Constantino et al., 2021 |                      |             |                    | x          |                            |            | x    |                       | x        |            |          | matrix                     | coop/not coop             | 1                                                      | 200                                                       |                    |                     |                   |                   |                             |                  | x <sup>[1]</sup> |          |                                                                                                                                                                                           | 3/2/1/0                                                              | [1]c in round 1, reciprocation with 80%possibility, change of decision after 3 cosequives same mutual decisions                                                      |
| Maeda and Hashimoto, 2020          |                      |             |                    |            |                            |            | x    | x                     |          |            |          | Give doubled               | give 3-5                  | 1                                                      | 1                                                         |                    |                     |                   |                   |                             |                  |                  |          |                                                                                                                                                                                           | depends on the amount given by each player                           |                                                                                                                                                                      |
| Horita, 2020                       |                      |             |                    | x          |                            |            | x    |                       | x        |            |          | Give doubled               | give/retain               | 1                                                      | 42                                                        |                    |                     |                   |                   |                             |                  |                  |          |                                                                                                                                                                                           | 60/40/20/0                                                           |                                                                                                                                                                      |
| Behrens et al., 2020               |                      |             |                    | x          |                            |            | x    |                       | x        |            |          | matrix                     | A,B,C,D,E,F               | 1                                                      | 60                                                        |                    |                     |                   |                   |                             |                  |                  |          |                                                                                                                                                                                           | 6x6 matrix                                                           |                                                                                                                                                                      |
| Hobbs et al., 2020                 |                      |             |                    | x          | x                          |            |      |                       | x        |            |          | matrix                     | coop/def                  | 2                                                      | 26                                                        | x <sup>[1]</sup>   |                     |                   |                   |                             |                  |                  |          |                                                                                                                                                                                           | 75/50/25/0                                                           | [1]one of two opponents defected in the first round                                                                                                                  |
| de Melo and Terada, 2020           |                      |             |                    | x          |                            | x          |      |                       | x        |            |          | Investment story           | project Green/Blue        | 1                                                      | 20                                                        |                    |                     |                   |                   |                             |                  | x <sup>[1]</sup> |          |                                                                                                                                                                                           | 7/5/3/2                                                              | [1]extortionate/generous 2D strategy (Press and Dyson [ref.no 228])                                                                                                  |
| Rostovtseva et al., 2020           |                      |             |                    | x          |                            |            | x    | x                     |          |            |          |                            | coop/def                  | 4                                                      | 1                                                         |                    |                     |                   |                   |                             |                  |                  |          |                                                                                                                                                                                           |                                                                      |                                                                                                                                                                      |
| Grujić and Lenaerts, 2020          |                      |             |                    | x(4)       |                            |            | x    |                       | x        |            |          | matrix                     | blue/yellow               |                                                        | 50(unknown)                                               |                    |                     |                   |                   |                             |                  |                  |          |                                                                                                                                                                                           | 6/5/1/0                                                              |                                                                                                                                                                      |
| Prétôt and McAuliffe, 2020         |                      |             |                    | x          |                            |            | x    |                       | x        |            |          | Tray and beans             | blue/green or red/yellow  | 1                                                      | 6                                                         |                    |                     |                   |                   |                             |                  |                  |          |                                                                                                                                                                                           | 4/3/1/0                                                              |                                                                                                                                                                      |
| Mieth et al., 2021                 |                      |             |                    | x          | x                          |            |      |                       |          | pA         |          | Joint invest (factor:4/3)  | coop/no coop              | 40                                                     | 1                                                         |                    |                     |                   |                   |                             |                  |                  |          |                                                                                                                                                                                           | 20/10/0/-10,10/5/0/-5                                                |                                                                                                                                                                      |
| Samu et al., 2020                  |                      |             |                    | x          |                            |            | x    | x                     |          |            |          | matrix                     | L/D                       | 20                                                     | 1                                                         |                    |                     |                   |                   |                             |                  |                  |          |                                                                                                                                                                                           | 2500/1500/500/0                                                      |                                                                                                                                                                      |
| Prétôt et al., 2020                |                      |             |                    | x          |                            |            | x    | x                     |          |            |          | Tray and beans             | blue/green or red/yellow  | 7                                                      | 1                                                         |                    |                     |                   |                   |                             |                  |                  |          |                                                                                                                                                                                           | 4/3/1/0                                                              |                                                                                                                                                                      |
| Koch et al., 2020                  |                      |             |                    | x          |                            | x          |      | x                     |          |            |          | Give doubled               | give 0-1 (step 0.1)       | 30                                                     | 1                                                         |                    |                     |                   |                   |                             |                  |                  |          |                                                                                                                                                                                           | depends on the amount given by each player                           |                                                                                                                                                                      |
| Neto et al., 2020                  |                      |             |                    | x          | x                          | x          |      |                       |          | pA,pB      |          |                            | coop/def                  | 2                                                      | 30                                                        |                    |                     |                   |                   |                             | x <sup>[1]</sup> |                  |          |                                                                                                                                                                                           | 3/2/1/0                                                              | [1]Rilling 2012 [ref.no 155]                                                                                                                                         |
| Lin et al., 2020                   |                      |             |                    | x          |                            | x          |      | x                     |          |            |          | matrix                     | A/B                       | 30                                                     | 1                                                         |                    |                     |                   |                   |                             |                  |                  |          |                                                                                                                                                                                           | 15/10/5/0                                                            |                                                                                                                                                                      |
| Cigarini et al., 2020              |                      |             |                    | x          |                            |            | x    | x                     |          |            |          | matrix (sharing resources) | coop/def                  | 2                                                      | 1                                                         |                    |                     |                   |                   |                             |                  |                  |          |                                                                                                                                                                                           | 15/10/5/0,3/2/1/0                                                    |                                                                                                                                                                      |
| Gallotti and Grujić, 2019          |                      |             |                    | x(8)       |                            |            | x    |                       | x        |            |          | matrix                     | blue/yellow               | fixed - reshuffled type(multiplayer), 1(vs individual) | random-unknown(47,60,58) (multiplayer),100(vs individual) |                    |                     |                   |                   |                             |                  |                  |          |                                                                                                                                                                                           | 10/7/0/0                                                             |                                                                                                                                                                      |
| V.Capraro, 2019                    |                      |             |                    | x          |                            |            | x    | x                     |          |            |          | Give doubled               | transfer/not transfer     | 1                                                      | 1                                                         |                    |                     |                   |                   |                             |                  |                  |          |                                                                                                                                                                                           | 30/20/10/0                                                           |                                                                                                                                                                      |
| Chen et al., 2019                  |                      | X(3)        |                    |            |                            |            | x    | x                     |          |            |          |                            | Strategy A,B              | 12 <sup>[1,2]</sup>                                    | 1                                                         |                    |                     |                   |                   |                             |                  |                  |          |                                                                                                                                                                                           | 22/20/18/16/14/12 based on the combination of choices <sup>[3]</sup> | [1]random regroup after each round [2]opponents decisions are anonymously presented [3]possibility of punishment after each round for a player of own or other group |
| Huang et al., 2019                 |                      |             |                    | x          |                            | x          |      | x                     |          |            |          |                            | coop/no coop              | 32                                                     | 1                                                         |                    |                     |                   |                   |                             |                  |                  |          |                                                                                                                                                                                           | 1.4/1/0.6/0.2, 1.4/1/0.6/0.5, 1.1/1/0.6/0.2, 1.1/1/0.6/0.5           |                                                                                                                                                                      |
| Javor et al., 2019                 |                      |             |                    | x          |                            | x          |      |                       | x        |            |          |                            | coop/no coop              | 4                                                      | 32(unknown)                                               |                    |                     |                   |                   |                             |                  | x <sup>[1]</sup> |          |                                                                                                                                                                                           | 50/30/10/0                                                           | [1]Rilling 2002 [ref.no 200]                                                                                                                                         |
| Yang and Yue, 2019                 |                      |             |                    | x          | x                          |            | x    | x                     | x        |            |          |                            | A/B                       | <=5,<=15 <sup>[1]</sup>                                | 1,<=25                                                    |                    |                     |                   |                   |                             |                  |                  |          |                                                                                                                                                                                           | 12/8/3/1                                                             | [1] possible opponent change in each round based on the previous 5 choices                                                                                           |
| Heuer and Orland, 2019             |                      |             |                    | x(10)      |                            |            | x    | x                     |          |            |          | matrix                     | A/B                       |                                                        | 1                                                         |                    |                     |                   |                   |                             |                  |                  |          |                                                                                                                                                                                           | 85/75/30/25                                                          |                                                                                                                                                                      |
| Eimontaite et al., 2019            |                      |             |                    | x          |                            |            |      |                       | x        |            |          | Prisoner's story           | keep silent/tell on       | 9                                                      | 12                                                        |                    |                     |                   |                   |                             |                  |                  |          |                                                                                                                                                                                           | 6 matrices: 5*n/3*n/-1*n/-5*n                                        |                                                                                                                                                                      |
| Thompson et al., 2019              |                      |             |                    | x          |                            | x          |      |                       | x        |            |          |                            | coop/no coop              | 3                                                      | 20                                                        |                    |                     |                   |                   |                             |                  | x <sup>[1]</sup> |          |                                                                                                                                                                                           | 3/2/1/0                                                              | [1]McClure 2007 [ref.no 183]                                                                                                                                         |
| Viola et al., 2019                 |                      |             |                    | x          |                            |            |      | x                     |          |            |          | Prisoner's story           |                           |                                                        |                                                           |                    |                     |                   |                   |                             |                  |                  |          |                                                                                                                                                                                           | 3/2/1/0                                                              |                                                                                                                                                                      |
| Zhang et al., 2019                 |                      |             |                    | x          |                            | x          |      |                       | x        |            |          |                            | coop/def                  | 1                                                      | 240                                                       |                    |                     |                   |                   |                             |                  |                  |          |                                                                                                                                                                                           | 3/2/1/0 <sup>[1]</sup>                                               | [1]changing matrix with stable mean reward values                                                                                                                    |
| Testori et al., 2019               |                      |             |                    | x(<=2)     |                            |            | x    |                       | x        |            |          |                            | coop/nothing              |                                                        | 50(unknown)                                               |                    |                     |                   |                   |                             |                  |                  |          |                                                                                                                                                                                           | coop: costs of 10 per neighbor while neighbors gain 60 each          |                                                                                                                                                                      |
| Mienaltowski and Wichman, 2020     |                      |             |                    | x          |                            | x          |      |                       | x        |            |          | Doors-keys                 | select door               | 1                                                      | 32                                                        | x                  |                     |                   |                   |                             |                  | x <sup>[1]</sup> |          |                                                                                                                                                                                           |                                                                      | [1]self-interest on 25% of rounds                                                                                                                                    |
| Baas et al., 2019                  |                      |             |                    | x          |                            |            |      |                       |          |            |          | matrix                     | C/NC                      |                                                        | 5                                                         |                    |                     |                   |                   |                             |                  |                  |          |                                                                                                                                                                                           | 6/4/3/2, 6/4/3/0                                                     |                                                                                                                                                                      |
| Rodriguez-Ruiz et al., 2019        |                      |             |                    | x          |                            | x          | x    | x                     |          |            |          |                            |                           | 1                                                      | 1                                                         |                    |                     |                   |                   |                             |                  |                  |          |                                                                                                                                                                                           | 160/90/30/10                                                         |                                                                                                                                                                      |
| Chu et al., 2019                   |                      |             |                    | x          |                            |            | x    |                       |          |            |          | matrix                     | split/steal               | 1                                                      |                                                           |                    |                     |                   |                   |                             |                  |                  |          |                                                                                                                                                                                           | 10/5/1/0                                                             | [1]d in round 1                                                                                                                                                      |
| Testori et al., 2019               |                      |             |                    | x          | x                          | x          |      |                       | x        |            |          | Product offer story        | standard price/sale price | 1                                                      | 30                                                        | tft <sup>[1]</sup> |                     |                   |                   |                             |                  |                  |          |                                                                                                                                                                                           | 40/30/20/10                                                          | [1]d in 2 last rounds                                                                                                                                                |
| Schaper et al., 2019               |                      |             |                    | x          | x                          |            |      | x                     |          |            |          | Joint invest (factor:4/3)  | coop/no coop              | 60                                                     | 1                                                         |                    |                     |                   |                   |                             |                  |                  |          |                                                                                                                                                                                           | 20/10/0/-10                                                          |                                                                                                                                                                      |
| Belaus et al., 2018                |                      |             |                    | x          |                            |            | x    |                       | x        |            |          |                            | A/B                       | 1                                                      | 1                                                         |                    |                     |                   |                   |                             |                  |                  |          |                                                                                                                                                                                           |                                                                      |                                                                                                                                                                      |
| Savulich et al., 2018              |                      |             |                    | x          |                            | x          |      |                       | x        |            |          | Split or steal             | split/steal               | 3                                                      |                                                           | x,tft              |                     |                   |                   |                             |                  |                  |          |                                                                                                                                                                                           | 2*n/n/0/0 2*n:points gathered                                        |                                                                                                                                                                      |
| Acosta et al., 2019                |                      |             |                    | x          |                            | x          |      |                       | x        |            |          |                            | left/right                | 2                                                      | 60                                                        |                    |                     |                   |                   |                             |                  | x <sup>[1]</sup> |          |                                                                                                                                                                                           | 20/20/0/10                                                           | [1]Rilling ,2004a [ref.no 195]                                                                                                                                       |
| Galbiati et al., 2018              |                      |             |                    | x          |                            |            | x    | x                     | x        |            |          | matrix                     | A/B                       | until 15min concluded                                  | 75% possibility for next round                            |                    |                     |                   |                   |                             |                  |                  |          |                                                                                                                                                                                           | 60/40/35/12, 50/40/25/12                                             |                                                                                                                                                                      |
| Gabay et al., 2018                 |                      |             |                    | x          |                            | x          |      |                       | x        |            |          |                            | compete/coop              | 6                                                      | 15                                                        |                    |                     |                   |                   |                             |                  |                  |          |                                                                                                                                                                                           | 120/90/60/30                                                         | [1]c in 13/15 rounds [2]c in 3/15 rounds                                                                                                                             |
| Zhang et al., 2018                 |                      |             |                    | x          | x                          |            |      |                       |          |            |          |                            | red/black card            | 1                                                      |                                                           | x                  |                     |                   |                   |                             |                  |                  |          |                                                                                                                                                                                           | 10/7/3/0                                                             |                                                                                                                                                                      |
| Taheri et al., 2018                |                      |             |                    | x          | x                          |            | x    |                       | x        |            |          |                            | collaborate/betray        | 2                                                      | 13-17                                                     |                    |                     |                   |                   |                             |                  |                  |          |                                                                                                                                                                                           | 0.5/0.3/0.1/0 <sup>[2]</sup>                                         | [1]Tft with random choice at 20% of rounds [2]possible loss or gain of 0.2 after a round                                                                             |
| Dorough and Glöckner, 2018         |                      |             |                    | x          |                            |            | x    | x                     |          |            |          | Give doubled               | transfer 0-200 (step 10)  | 1                                                      | 6                                                         |                    |                     |                   |                   |                             |                  |                  |          |                                                                                                                                                                                           | 30/20/10/0                                                           |                                                                                                                                                                      |
| Bitsch et al., 2018a               |                      |             |                    | x          |                            | x          |      |                       | x        |            |          |                            | C/D                       | 3                                                      | 6                                                         |                    |                     |                   |                   |                             |                  |                  |          |                                                                                                                                                                                           | 20/20/0/10                                                           | [1]c in 5 rounds [2]c in 3rounds [3]d in 5 rounds                                                                                                                    |
| Deutchman and Sullivan, 2018       |                      |             |                    | x          |                            | x          |      |                       | x        |            |          | Prisoner's story, matrix   | coop/betray, A/B          | 1                                                      | 1                                                         |                    |                     |                   |                   |                             |                  |                  |          |                                                                                                                                                                                           | 20/10/15/0, 0/-10/-15/-20                                            |                                                                                                                                                                      |
| Wang et al., 2018                  |                      |             |                    | x          |                            |            | x    |                       | x        |            |          | matrix                     | 1/2/3                     | ~20(until 75min)                                       | ~4(25% possibility next round)                            |                    |                     |                   |                   |                             |                  |                  |          |                                                                                                                                                                                           | 3/1/0/-2 <sup>[1]</sup>                                              | [1]reward option costs 2 for player and gains 3 for the opponent                                                                                                     |

|                                 |                  |  |  |          |   |   |  |   |   |       |                  |                                      |                                   |                           |                                      |                          |                 |  |                      |                                |                                                        |                                                                   |                                                                      |                                                                       |                              |
|---------------------------------|------------------|--|--|----------|---|---|--|---|---|-------|------------------|--------------------------------------|-----------------------------------|---------------------------|--------------------------------------|--------------------------|-----------------|--|----------------------|--------------------------------|--------------------------------------------------------|-------------------------------------------------------------------|----------------------------------------------------------------------|-----------------------------------------------------------------------|------------------------------|
| Acedo-Carmona and Gomila, 2018  |                  |  |  | x        |   | x |  | x |   |       | matrix           | share/get                            | 2                                 | 3                         | x                                    |                          | x               |  |                      | 6/3/1/0                        |                                                        |                                                                   |                                                                      |                                                                       |                              |
| Vives and FeldmanHall, 2018     |                  |  |  | x        |   |   |  | x |   |       |                  |                                      |                                   |                           |                                      |                          |                 |  |                      | 5/4/1/0                        |                                                        |                                                                   |                                                                      |                                                                       |                              |
| Arechar et al., 2018            |                  |  |  | x        |   |   |  | x | x |       | matrix           | A/B                                  | many                              | 7/8,1/8 next round        |                                      |                          |                 |  |                      | 5/4/1/0                        |                                                        |                                                                   |                                                                      |                                                                       |                              |
| Levine et al., 2018             |                  |  |  | x        |   |   |  |   |   | pA,pB | Give doubled     | transfer/not transfer                | 1                                 | 1                         |                                      |                          |                 |  |                      | 90/60/30/0                     |                                                        |                                                                   |                                                                      |                                                                       |                              |
| Colman et al., 2018             |                  |  |  | x        |   |   |  |   |   |       | matrix           | J/K                                  | 1                                 | 300                       |                                      |                          |                 |  |                      | 5/3/1/0,5/4/1/0                |                                                        |                                                                   |                                                                      |                                                                       |                              |
| Bruno et al., 2018              | x                |  |  |          |   |   |  | x |   |       |                  |                                      | 1                                 | 11                        |                                      |                          |                 |  |                      |                                |                                                        |                                                                   |                                                                      |                                                                       |                              |
| Antonioni et al., 2018          |                  |  |  | x        |   |   |  |   |   |       | matrix           | X/Y                                  | 1                                 | 10(unknown)               |                                      |                          |                 |  |                      | 4*n/3*n/2*n/1*n <sup>[1]</sup> | [1]asymmetric PD, n based on hierarchy for each player |                                                                   |                                                                      |                                                                       |                              |
| Bitsch et al., 2018b            |                  |  |  | x        |   |   |  |   |   |       | matrix           | coop/def                             | 21                                | 6                         |                                      |                          |                 |  | x <sup>[1,2,3]</sup> | 20/20/0/10                     | [1]c in 5 rounds [2]c in 3rounds [3]d in 5 rounds      |                                                                   |                                                                      |                                                                       |                              |
| Li et al., 2018                 |                  |  |  | x        |   |   |  |   |   |       | matrix           | triangle/circle shape <sup>[1]</sup> | 1                                 | 10                        |                                      |                          |                 |  | x                    | 4/3/2/1                        | [1]punishment option for the cooperator after round    |                                                                   |                                                                      |                                                                       |                              |
| Rilling et al., 2018            |                  |  |  | x        | x | x |  |   |   |       | pA,pB            | coop/def                             | 4                                 | 30                        |                                      |                          |                 |  |                      | x <sup>[1]</sup>               | 3/2/1/0                                                | [1]Rilling 2012 [ref.no 155]                                      |                                                                      |                                                                       |                              |
| Hu et al., 2018                 |                  |  |  | x        |   |   |  |   |   |       | x <sup>[1]</sup> |                                      | 1                                 | 120                       |                                      |                          |                 |  |                      |                                | 6/5/1/0,7/4/1-1                                        | [1]half told opponent is the computer                             |                                                                      |                                                                       |                              |
| Menshikov et al., 2017          |                  |  |  | x        |   |   |  |   |   |       | x                | x                                    | x                                 | 3                         | 18                                   |                          |                 |  |                      |                                | 10/5/1/0                                               |                                                                   |                                                                      |                                                                       |                              |
| Kaartinen et al., 2017          |                  |  |  | x        |   |   |  |   |   |       | pB               |                                      | 2                                 | 1                         |                                      |                          |                 |  |                      |                                | 3/2/1/0                                                |                                                                   |                                                                      |                                                                       |                              |
| Bell et al., 2017               |                  |  |  | x        | x |   |  |   |   |       | pA               | Joint invest (factor:4/3)            | coop/no coop                      | 48                        | 1                                    |                          |                 |  |                      |                                | 20/10/0/-10,10/5/0/-5                                  |                                                                   |                                                                      |                                                                       |                              |
| Bland et al., 2017              |                  |  |  | x        | x |   |  |   |   |       |                  | Split or steal                       | split/steal                       | 3                         | 9                                    |                          |                 |  |                      |                                | 2*n/n/0/0, 2*n:points gathered                         |                                                                   |                                                                      |                                                                       |                              |
| Jahng et al., 2017              |                  |  |  | x        |   |   |  |   |   |       | x(live)          |                                      | x                                 | 1                         | 30(unknown)                          |                          |                 |  |                      |                                | 10/5/3/0                                               |                                                                   |                                                                      |                                                                       |                              |
| Barreda-Tarrazona et al., 2017  |                  |  |  | x        |   |   |  |   |   |       | x                | x                                    | x                                 | 10(one-shot),2(iterated)  | 1(one-shot),10(iterated)             |                          |                 |  |                      |                                | 28/20/10/0,2.8/2/1/0                                   |                                                                   |                                                                      |                                                                       |                              |
| Peshkovskaya et al., 2017       |                  |  |  | x        |   |   |  |   |   |       | x                | x                                    | x                                 | up/down,left/right        | <=11(one-shot),1(iterated)           | 1(one-shot),15(iterated) |                 |  |                      |                                | 10/5/1/0                                               |                                                                   |                                                                      |                                                                       |                              |
| Melamed et al., 2017            |                  |  |  | x        |   |   |  |   |   |       | x                | x                                    | x                                 | matrix                    | contribute/not contribute            | >=3                      | 12(unknown)     |  |                      |                                | 7/4/1/-1                                               |                                                                   |                                                                      |                                                                       |                              |
| Chen et al., 2017               |                  |  |  | x        | x | x |  |   |   |       | pA,pB            | coop/def                             | 2                                 | 30                        |                                      |                          |                 |  |                      | x <sup>[1]</sup>               | 3/2/1/0                                                | [1]Rilling 2012 [ref.no 155]                                      |                                                                      |                                                                       |                              |
| Lambert et al., 2017            |                  |  |  | x        |   |   |  |   |   |       | pA               |                                      | K/L                               | 25                        | 120(randomly distributed among opps) |                          |                 |  |                      | x <sup>[1]</sup>               | 25 different matrices with standard T-R=1              | [1]60% c after c, 100% d after d                                  |                                                                      |                                                                       |                              |
| Mieth et al., 2016a             |                  |  |  | x        | x |   |  |   |   |       |                  | x                                    |                                   | Joint invest (factor:4/3) | coop/not coop <sup>[1]</sup>         | 20                       |                 |  |                      |                                | 20/10/0/-10                                            | [1]punishment option for the cooperator after round               |                                                                      |                                                                       |                              |
| Pansini et al., 2016            |                  |  |  | x        |   |   |  |   |   |       | x                |                                      | x                                 | coop/def/punish           | many                                 | 75% next round           |                 |  |                      |                                | 3/1/0/-2 <sup>[1]</sup>                                | [1]punishment option costs 1 for player and 6 for the opponent    |                                                                      |                                                                       |                              |
| Sorgi and Wout, 2016            |                  |  |  | x        |   |   |  |   |   |       |                  |                                      | x                                 | coop/def                  | 3                                    | 12                       |                 |  |                      |                                | 10/6/2/0,5/3/1/0                                       | [1]c in 25% of rounds [2]c in 50% of rounds [3]c in 75% of rounds |                                                                      |                                                                       |                              |
| Rawolle et al., 2016            |                  |  |  | x        |   |   |  |   |   |       |                  |                                      | x                                 | coop/no-coop              | 1                                    | 10                       |                 |  |                      |                                | 65/60/20/15                                            | [1]c in 2 rounds                                                  |                                                                      |                                                                       |                              |
| Mieth et al., 2016b             |                  |  |  | x        | x |   |  |   |   |       | pA               | Joint invest (factor:4/3)            | invest 15/30                      | 20                        | 1                                    |                          |                 |  |                      |                                | 15/10/5/0                                              |                                                                   |                                                                      |                                                                       |                              |
| Sun et al., 2016                |                  |  |  | x        |   |   |  |   |   |       |                  |                                      | x                                 | C/D                       | 80                                   | 1                        |                 |  |                      |                                | 30/20/10/0,0/-10/-20/-30                               |                                                                   |                                                                      |                                                                       |                              |
| Lukinova and Myagkov, 2016      |                  |  |  | x        |   |   |  |   |   |       |                  |                                      | x                                 | up/down                   | ?                                    | 30trials                 |                 |  |                      |                                | x <sup>[1]</sup>                                       | 6/4/2/1                                                           | [1]d in 85% of rounds and c in 15%                                   |                                                                       |                              |
| Matsumoto et al., 2016          |                  |  |  | x        |   |   |  |   |   |       | x                | x                                    | pA,pB                             | Give doubled              | amount to give                       | 9                        | 1               |  |                      |                                |                                                        | depends on the amount given by each player                        |                                                                      |                                                                       |                              |
| Yao and Yu, 2016                |                  |  |  | x        |   |   |  |   |   |       |                  |                                      | x                                 | C/D                       | 1                                    | 12                       |                 |  |                      |                                | x <sup>[1]</sup>                                       | 8/4/-1/-5                                                         | [1]d in rounds 1,5 and 9                                             |                                                                       |                              |
| Antonioni et al., 2016          |                  |  |  | x(2,3,4) |   |   |  |   |   |       | x                | x                                    |                                   | matrix                    | A/B                                  | 30(unknown)              |                 |  |                      |                                |                                                        | 10/7/0/0                                                          |                                                                      |                                                                       |                              |
| Bone et al., 2016               |                  |  |  | x        |   |   |  |   |   |       | x                | x                                    |                                   | matrix                    | interact time(0-5) <sup>[1]</sup>    | 2                        | 50(unknown)     |  |                      |                                |                                                        | 5x5 matrix                                                        | [1]punishment option after round with different cost per player type |                                                                       |                              |
| Schneider-Hassloff et al., 2016 |                  |  |  | x        |   |   |  |   |   |       | ?                |                                      | x                                 | ?                         | 2                                    | 1                        |                 |  |                      |                                |                                                        | 6/5/1/0                                                           |                                                                      |                                                                       |                              |
| Wang et al., 2016               |                  |  |  | x        | x | x |  |   |   |       |                  |                                      | x                                 | matrix                    | C/D                                  | 2                        | 60,500(unknown) |  |                      |                                |                                                        | x <sup>[1]</sup>                                                  | 5/3/1/0                                                              | [1]extortionate/generous 2D strategy (Press and Dyson [ref.no 228])   |                              |
| Bell et al., 2016               |                  |  |  | x        |   |   |  |   |   |       | pA               | Joint invest (factor:4/3)            | invest 15/30                      | 18                        | 1                                    |                          |                 |  |                      |                                |                                                        | 10/5/-5/-10                                                       |                                                                      |                                                                       |                              |
| Collins et al., 2016            |                  |  |  | x        |   |   |  |   |   |       | x                |                                      | x                                 | matrix                    | A/B                                  | 1-2                      | 50              |  |                      |                                | x <sup>[1]</sup>                                       | Pavlov -tft                                                       | 4/1/-1/-4                                                            | [1]random choice in two rounds                                        |                              |
| Fermin et al., 2016             |                  |  |  | x        |   |   |  |   |   |       | pA               | Give doubled                         | provide/not provide (100/200/400) | 15                        | 1                                    |                          |                 |  |                      |                                |                                                        | 3*n/2*n/n/0, n{100.200.400}                                       |                                                                      |                                                                       |                              |
| Luo et al., 2016                |                  |  |  | x        | x |   |  |   |   |       |                  |                                      | x                                 | Prisoner's story          | coop/def                             | 1                        | 136             |  |                      |                                |                                                        | x                                                                 | 0/-3/-8/-10                                                          |                                                                       |                              |
| Etzel et al., 2016              |                  |  |  | x        |   |   |  |   |   |       | x                |                                      | x                                 | matrix                    | C/D                                  | 2                        | 3               |  |                      |                                |                                                        | x <sup>[1,2]</sup>                                                | 3/2/1/0, 4/2/0/-1, 5/3/-1/-3 <sup>[3]</sup>                          | [1]cooperating strategy [2]competing strategy [3]one matrix per round |                              |
| Gradin et al., 2016             |                  |  |  | x        |   |   |  |   |   |       |                  |                                      | x                                 | coop/no coop              | 1                                    | 76                       |                 |  |                      |                                |                                                        | x <sup>[1]</sup>                                                  | 3/2/1/0                                                              | [1]McClure 2007 [ref.no 183]                                          |                              |
| Wildschut et al., 2015          |                  |  |  |          |   |   |  |   |   |       | pA               | pA                                   | Joint invest (factor:4/3)         | invest 15/30              | 150                                  | 1,4                      |                 |  |                      |                                |                                                        |                                                                   | 15/10/5/0                                                            |                                                                       |                              |
| Bell et al., 2015               |                  |  |  | x        |   |   |  |   |   |       | pA               | pA                                   | Joint invest (factor:4/3)         | invest 15/30              | 150                                  | 1,4                      |                 |  |                      |                                |                                                        |                                                                   | 15/10/5/0                                                            |                                                                       |                              |
| Weisel and Böhm, 2015           | x <sup>[1]</sup> |  |  |          |   |   |  |   |   |       | x                |                                      |                                   |                           |                                      |                          |                 |  |                      |                                |                                                        |                                                                   | [1]Intergroup Prisoner's Dilemma-Maximizing Difference (IPD-MD)      |                                                                       |                              |
| Ciaro et al., 2015              |                  |  |  | x        |   |   |  |   |   |       |                  |                                      | x                                 | Students' copy story      | coop/compete                         | 8                        | 1               |  |                      |                                |                                                        |                                                                   | 0/-1/-6/-7                                                           |                                                                       |                              |
| Soutschek et al., 2015          |                  |  |  | x        | x |   |  |   |   |       |                  |                                      | x                                 | coop yes/no               | 4                                    | 12                       |                 |  |                      |                                |                                                        | x <sup>[1]</sup>                                                  | 3/2/0/-1                                                             | [1]Tft with 20% possibility of changing decision                      |                              |
| Ng and Au, 2015                 |                  |  |  | x        |   |   |  |   |   |       |                  |                                      | x                                 | A/B                       | 28                                   | 1                        |                 |  |                      |                                |                                                        |                                                                   | 28 matrices <sup>[1]</sup>                                           | [1]different coop [ref.no 229] and risk [ref.no 230] index values     |                              |
| C. Feng et al., 2015            |                  |  |  | x        | x | x |  |   |   |       | pA,pB            | cop/def                              | 2                                 | 30(pA),30(pB)             |                                      |                          |                 |  |                      |                                |                                                        | x <sup>[1]</sup>                                                  | 3/2/1/0                                                              | [1]Rilling 2012 [ref.no 155]                                          |                              |
| Schneider-Hassloff et al., 2015 |                  |  |  | x        |   |   |  |   |   |       | pA               | left/right                           | 2                                 | 10                        |                                      |                          |                 |  |                      |                                |                                                        | x <sup>[1]</sup>                                                  | 20/20/10/0                                                           | [1]Rilling 2004a [ref.no 195]                                         |                              |
| Capraro and Cococcioni, 2015    |                  |  |  | x        |   |   |  |   |   |       |                  |                                      | x                                 | Give doubled              | transfer (0-20)                      | 1                        | 1               |  |                      |                                |                                                        |                                                                   |                                                                      | depends on the amount given by each player                            |                              |
| Reimers and Diekhof, 2015       |                  |  |  | x        |   |   |  |   |   |       |                  |                                      | x                                 | matrix                    | coop/def                             | 40                       | 1               |  |                      |                                |                                                        |                                                                   | 60/40/20/0                                                           |                                                                       |                              |
| Chen et al., 2015               |                  |  |  | x        | x | x |  |   |   |       | pA,pB            | matrix                               | coop/def                          | 2                         | 30(pA),30(pB)                        |                          |                 |  |                      |                                |                                                        | x <sup>[1]</sup>                                                  | 3/2/1/0                                                              | [1]Rilling 2012 [ref.no 155]                                          |                              |
| Dreu et al., 2015               | x <sup>[1]</sup> |  |  |          |   |   |  |   |   |       |                  |                                      |                                   |                           |                                      |                          |                 |  |                      |                                |                                                        |                                                                   | [1]IPD-MD                                                            |                                                                       |                              |
| Chunliang Feng et al., 2015     |                  |  |  |          |   |   |  |   |   |       | pA,pB            | coop/def                             | 2                                 | 30(pA),30(pB)             |                                      |                          |                 |  |                      |                                |                                                        |                                                                   | x <sup>[1]</sup>                                                     | 3/2/1/0                                                               | [1]Rilling 2012 [ref.no 155] |
| Dorrough et al., 2015           |                  |  |  | x        |   |   |  |   |   |       |                  |                                      | x                                 | Give doubled              | transfer (0-10)                      | 20                       | 1               |  |                      |                                |                                                        |                                                                   |                                                                      |                                                                       |                              |
| Safin et al., 2015              |                  |  |  | x        | x |   |  |   |   |       |                  |                                      | x                                 | blue/green                | 2                                    | 40                       |                 |  |                      |                                |                                                        |                                                                   |                                                                      | x                                                                     | 10/9/2/1,4/3/2/1             |

|                                         |            |        |  |        |   |   |  |   |   |       |                             |                                    |                      |             |      |   |   |                  |                                                                                                      |                                                                                                                                                    |
|-----------------------------------------|------------|--------|--|--------|---|---|--|---|---|-------|-----------------------------|------------------------------------|----------------------|-------------|------|---|---|------------------|------------------------------------------------------------------------------------------------------|----------------------------------------------------------------------------------------------------------------------------------------------------|
| Pinel et al., 2015                      |            |        |  | x      |   |   |  | x |   |       | A/B                         | 10                                 |                      |             | x    |   |   |                  | 4/3/1/0                                                                                              |                                                                                                                                                    |
| Saunders et al., 2015                   |            |        |  | x      |   |   |  | x |   |       | coop/def                    | 1                                  | 40(20x2)             | x,stf<br>t  |      |   |   | x <sup>[1]</sup> | 70/40/20/0                                                                                           |                                                                                                                                                    |
| Soutschek et al., 2015                  |            |        |  | x      | x |   |  | x |   |       | coop yes/no                 | 1                                  | 98,140,195           |             |      |   |   | x <sup>[1]</sup> | 3/2/0/-1                                                                                             | [1]Tft with 20% possibility of changing decision                                                                                                   |
| Bone et al., 2015                       |            |        |  | x      |   |   |  | x |   |       | matrix                      | A/B/not participate <sup>[1]</sup> | 2                    | 50(unknown) |      |   |   |                  | 3/1/0/-2                                                                                             | [1]punishment option after round with different cost per player type                                                                               |
| V.Capraro, 2014                         |            |        |  | x      |   |   |  | x | x |       | Give [2,3,4,5,10]fold       | transfer (0-10)                    | 1                    | 1           |      |   |   |                  | depends on the number the transferred amount is multiplied and the amount transferred by each player |                                                                                                                                                    |
| Edmiston et al., 2014                   |            |        |  | x      |   |   |  | x |   |       | coop/compete                | 1                                  | 20                   |             |      |   |   | x <sup>[1]</sup> | 3/2/1/0                                                                                              | [1]Rilling 2002 [ref.no 200]                                                                                                                       |
| Christensen et al., 2014                |            |        |  |        |   |   |  | x |   |       | Sharing Secrets story       | interviewer correct/incorrect      | 1                    |             |      |   |   |                  | 0/-45/-30/-60                                                                                        |                                                                                                                                                    |
| Capraro and Marcelletti, 2014           |            |        |  | x      |   |   |  | x |   |       | Give doubled                | hand over/do not                   | 1                    | 1           |      |   |   |                  | 0.6/0.4/0.2/0                                                                                        |                                                                                                                                                    |
| Feng et al., 2014                       |            |        |  | x      | x | x |  |   |   | pA,pB | coop/def                    | 2                                  | 30(pA),30(pB)        |             |      |   |   |                  | 3/2/1/0                                                                                              | [1] Rilling 2012 [ref.no 155]                                                                                                                      |
| Johnstone et al., 2015                  |            |        |  | x      | x |   |  | x |   |       |                             |                                    | 2                    | 15          |      |   |   |                  | 6/5/1/0                                                                                              |                                                                                                                                                    |
| Pulcu et al., 2014                      |            |        |  | x      | x |   |  | x |   |       | Water shortage story        |                                    | 1                    | 31          | tf2t |   |   |                  | 8/5/1/0                                                                                              |                                                                                                                                                    |
| Bednarik et al., 2014                   |            |        |  | x      |   |   |  | x |   |       | orange/blue                 | 3+                                 | 30(unknown)          |             |      |   |   |                  | 0.4/0.25/0/-0.1                                                                                      |                                                                                                                                                    |
| Yamagishi et al., 2014                  |            |        |  | x      |   |   |  | x | x | pA,pB | Give doubled                |                                    | 9                    | 1           |      |   |   |                  | 3*n/2*n/n/0                                                                                          |                                                                                                                                                    |
| Clark et al., 2014                      |            |        |  | x      |   |   |  | x |   |       | coop/def                    | 1                                  | 10                   | x           |      |   |   |                  | 5/3/1/0                                                                                              |                                                                                                                                                    |
| Mengel, 2014                            |            |        |  | x      |   |   |  | x |   |       | matrix                      | A/B                                | 10                   | 1           |      |   |   |                  | 450/400/200/100,450/400/120/100                                                                      |                                                                                                                                                    |
| Carolyn Henriette Declerck et al., 2013 |            |        |  | x      |   |   |  | x |   | pB    | L/S                         | 2                                  | 1                    |             |      |   |   |                  | 12/8/4/1                                                                                             |                                                                                                                                                    |
| Cárdenas et al., 2014                   |            |        |  | x      |   |   |  | x |   |       | Balls in baskets            | private/public basket              | 1                    | 10          |      |   |   |                  | 5/4/3/2                                                                                              |                                                                                                                                                    |
| Li et al., 2014                         |            |        |  | x      |   |   |  | x |   |       | matrix                      | circle/triangular                  | 1                    | 10          | x    |   |   |                  | 4/3/2/1                                                                                              |                                                                                                                                                    |
| Aksoy and Weesie, 2014                  |            |        |  | x      |   |   |  |   |   | pA,pB | Joint invest                | invest/not invest                  | 4(pA),4(pB)          | 1           |      |   |   |                  | 8 different reward matrices <sup>[1]</sup>                                                           | [1]Asymmetric PD                                                                                                                                   |
| Kjell and Thompson, 2013                |            |        |  | x      |   |   |  | x |   |       | A/B                         | 1                                  | 10                   | x           |      |   |   |                  | 3/2/1/0                                                                                              |                                                                                                                                                    |
| Sakaiya et al., 2013                    |            |        |  | x      | x | x |  | x |   |       | coop/def                    | 4                                  | 20-23(unknown)       | x           |      |   |   | x                | 50/30/10/0                                                                                           |                                                                                                                                                    |
| Emonds et al., 2013                     |            |        |  | x      |   |   |  | x |   |       | K/L                         | 25                                 | 1                    |             |      |   |   | x <sup>[1]</sup> | 25 different matrices                                                                                | [1]Rilling 2004b [ref.no 227]                                                                                                                      |
| Rilling et al., 2014                    |            |        |  | x      | x | x |  |   |   | pA,pB | coop/def                    | 2                                  | 30(pA),30(pB)        |             |      |   |   | x <sup>[1]</sup> | 3/2/1/0                                                                                              | [1]Rilling 2012 [ref.no 155]                                                                                                                       |
| Kovács-Bálint et al., 2012              |            |        |  | x      | x |   |  | x |   |       | Prisoner's story            | coop/no coop                       | 1                    | 1           |      |   |   |                  |                                                                                                      |                                                                                                                                                    |
| Acedo and Gomila, 2013                  |            |        |  | x      |   |   |  | x |   |       | C/D                         | 1                                  | 3                    |             |      |   |   |                  | 6/3/1/0                                                                                              |                                                                                                                                                    |
| Eimontaite et al., 2013                 |            |        |  | x      |   |   |  | x |   |       | Prisoner's story            | tell on/keep silent                | 1                    | 3           |      |   |   |                  | 50000/30000/-10000/-5000                                                                             |                                                                                                                                                    |
| Safin et al., 2013                      |            |        |  | x      |   |   |  | x |   |       | matrix                      | green/blue circles                 | 1                    | 40          |      |   |   |                  | 4/3/2/1, 10/9/2/1                                                                                    |                                                                                                                                                    |
| Papageorgiou et al., 2013               |            |        |  | x      | x |   |  | x |   |       | coop/def                    | 1                                  | 90(unknown)          |             |      |   |   | x <sup>[1]</sup> | 5/3/1/0                                                                                              | [1]Tft with predefined C in rounds 5,10,20,30,40,50,60,70,80,90                                                                                    |
| Gerbası and Prentice, 2013              |            |        |  | x      |   |   |  | x |   |       | A/B                         | 1                                  | 10                   |             |      |   |   |                  | p:400/200/100/0 opp:200/100/50/0 <sup>[1]</sup>                                                      | [1]Asymmetric PD                                                                                                                                   |
| Clark et al., 2013                      |            |        |  | x      |   |   |  | x |   |       |                             |                                    | 1                    | 10          | x    |   |   |                  | 5/3/1/0                                                                                              |                                                                                                                                                    |
| Carolyn H. Declerck et al., 2013        |            |        |  | x      |   |   |  | x |   | pB    | L/S                         | 2                                  | 1                    |             |      |   |   |                  | 12/8/4/1                                                                                             |                                                                                                                                                    |
| Tabak et al., 2013                      |            |        |  | x      | x |   |  | x |   |       | C/D                         | 1                                  | 20-40                |             |      |   |   | x <sup>[1]</sup> | 3/2/1/0                                                                                              | [1]50%ftt for the 1-12 rounds, D for 7 rounds after 12 consecutive rounds of cooperation                                                           |
| Gervais et al., 2013                    |            |        |  | x      |   |   |  | x | x |       | Give doubled                | give/keep 3                        | 2                    | 1           |      |   |   |                  | 9/6/3/0                                                                                              |                                                                                                                                                    |
| Storey and Workman, 2013                |            |        |  | x      |   |   |  | x |   |       | coop/def                    | 1                                  | 5                    |             |      |   |   |                  |                                                                                                      |                                                                                                                                                    |
| Locey et al., 2012                      | x(5,10,20) |        |  | x      |   |   |  | x | x |       | matrix                      | X/Y                                | 1                    | 1           |      |   |   |                  | 10/9/2/1, 4/3/2/1, rewards based on how many players chose Y (Y:nY*100, X:nY*100+300)                |                                                                                                                                                    |
| Rodebaugh et al., 2013                  |            |        |  | x      | x |   |  | x |   |       | Give doubled - keep tripled | keep/share (1-10) <sup>[2]</sup>   | 2                    | 40          | x    |   |   | x <sup>[1]</sup> | depends on the amount given by each player                                                           | [1]Raise the Stakes [ref.no 161] [2]change of player's decision (adding or subtracting 3) in 10% of rounds                                         |
| Yamagishi et al., 2012                  |            |        |  | x      |   |   |  | x |   |       |                             |                                    |                      |             |      |   |   |                  |                                                                                                      |                                                                                                                                                    |
| Tayama et al., 2012                     |            |        |  | x      |   |   |  | x |   |       | Card 1/2                    | 1                                  | <=100 <sup>[1]</sup> |             |      |   |   | x <sup>[2]</sup> | 5/4/-4/-5                                                                                            | [1]End of game determined by difference in combination of DD and CC (Punishment-score), [2]Tft with increasing cooperation after eight D of player |
| Yang et al., 2013                       |            |        |  | x      | x |   |  | x |   |       |                             |                                    |                      | 1           |      |   |   |                  | 5/3/1/0                                                                                              |                                                                                                                                                    |
| Fehl et al., 2012                       |            |        |  | x      |   |   |  | x | x |       | Joint invest (factor:1.6)   | contribute/not 1E <sup>[1]</sup>   | 5                    | 1           |      |   |   |                  | 0.8/0.6/0/-0.2                                                                                       | [1]punishment option after round                                                                                                                   |
| Grujić et al., 2012                     |            | x(<=5) |  |        |   |   |  | x |   |       | matrix                      | A/B <sup>[1]</sup>                 |                      |             |      |   |   |                  | rewards based on how many players chose A (A:(nA-1)*7, B:nA*10)                                      | [1]random change of player's decision                                                                                                              |
| Wang et al., 2012                       |            |        |  | x(<24) |   |   |  | x |   |       | matrix                      | A/B                                |                      | 12          |      |   |   |                  | 7/4/1/-1                                                                                             |                                                                                                                                                    |
| Locey and Rachlin, 2012                 |            |        |  |        | x |   |  | x |   |       | blue/red                    | 1                                  | 100                  | x           |      |   |   |                  | 30/25/15/10                                                                                          |                                                                                                                                                    |
| Martin et al., 2013                     | x          |        |  | x      | x |   |  | x |   |       | matrix                      | action A/B                         | 1                    | 200         | x    | x | x | x                | 10/1/-1/-10                                                                                          |                                                                                                                                                    |
| Gracia-Lazaro et al., 2012              |            |        |  |        |   |   |  | x |   |       | matrix                      | brown/green                        |                      | 51,59       |      |   |   |                  | 10/7/0/0                                                                                             |                                                                                                                                                    |
| Locey and Rachlin, 2011                 |            |        |  | x      | x |   |  | x |   |       | matrix                      | X/Y                                | 1                    | 100         | x    |   |   |                  | 5/4/2/1,2/1/-1/-2                                                                                    |                                                                                                                                                    |
| Ellett et al., 2013                     |            |        |  | x      | x | x |  | x |   |       | X/Y                         | 1                                  | 1(unknown)           |             |      |   |   |                  | 120/90/60/30                                                                                         |                                                                                                                                                    |
| Pfeiffer et al., 2012                   |            |        |  | x      |   |   |  | x |   |       | A/B                         | 1,many                             | 29(unknown),4        |             |      |   |   |                  | 30/20/0/-10                                                                                          |                                                                                                                                                    |
| Locey et al., 2011                      |            |        |  |        | x |   |  |   |   |       | Chests-keys                 | select chest                       | 0                    | 40          | x    |   |   |                  | 4/3/2/1,6/5/2/1                                                                                      |                                                                                                                                                    |
| Ewoldsen et al., 2012                   |            |        |  | x      |   |   |  | x |   |       | Give doubled                | give dimes 0-4                     | 1                    | 10          |      |   |   |                  | depends on the amount given by each player                                                           |                                                                                                                                                    |
| McClure et al., 2013                    |            |        |  | x      |   |   |  | x |   |       | strategy A/B                | 4                                  | 1                    |             |      |   |   |                  | 6/4/2/0                                                                                              |                                                                                                                                                    |
| Glöckner and Hilbig, 2012               |            |        |  | x      |   |   |  | x |   |       | 1/2                         | many                               | 20                   |             |      |   |   |                  | 300/200/100/50,300/varied/varied/50                                                                  |                                                                                                                                                    |
| Emonds et al., 2012                     |            |        |  | x      |   |   |  | x |   |       | invest/not                  | 28                                 | 1                    |             |      |   |   |                  | 3/2/1/0,6/5/1/0,2/1/-1/-2,8/5/2/0                                                                    |                                                                                                                                                    |

|                           |                  |          |      |   |   |   |   |   |   |  |       |                                        |                                             |         |                       |                           |  |                  |                      |                  |                                                                                                                                    |                                                                                                                                                                                  |
|---------------------------|------------------|----------|------|---|---|---|---|---|---|--|-------|----------------------------------------|---------------------------------------------|---------|-----------------------|---------------------------|--|------------------|----------------------|------------------|------------------------------------------------------------------------------------------------------------------------------------|----------------------------------------------------------------------------------------------------------------------------------------------------------------------------------|
| Balliet et al., 2011      |                  |          |      | x |   | x |   |   | x |  |       | matrix                                 | option A/B                                  | 1       | 2(unknown)            |                           |  | x                |                      |                  | 100/60/40/0                                                                                                                        |                                                                                                                                                                                  |
| Rilling et al., 2012      |                  |          |      | x | x | x | x |   |   |  | pA,pB |                                        | coop/def                                    | 2       | 30(pA),30(pB)         |                           |  |                  | x <sup>[1]</sup>     |                  | 3/2/1/0                                                                                                                            | [1]Rilling 2012 [ref.no 155]                                                                                                                                                     |
| Volstorf et al., 2011     |                  |          |      | x | x |   |   |   |   |  |       | Boss-colleagues story                  | coop/refuse                                 | 20      | 10(unknown)           | x                         |  | x                |                      |                  | 5/3/1/0                                                                                                                            |                                                                                                                                                                                  |
| McClure-Tone et al., 2011 |                  |          |      | x |   | x |   |   |   |  |       |                                        | coop/no-coop                                | 4       | 20                    |                           |  |                  | x <sup>[1]</sup>     |                  | 3/2/1/0                                                                                                                            | [1]McClure 2007 [ref.no 183]                                                                                                                                                     |
| Dijk et al., 2011         |                  |          |      | x | x |   |   |   |   |  |       |                                        | coop/def                                    | 1       | 2                     |                           |  |                  | x                    |                  | 5/3/1/0                                                                                                                            |                                                                                                                                                                                  |
| Tabak et al., 2012        |                  |          |      | x |   | x |   |   |   |  |       |                                        | ?                                           | 1       | 34                    | 50%<br>ftt                |  | x                | x                    |                  | 3/2/1/0                                                                                                                            |                                                                                                                                                                                  |
| Fallani et al., 2010      |                  |          |      | x |   |   |   |   | x |  |       |                                        | coop/def                                    | 1       | 200                   |                           |  |                  |                      |                  | 3/2/1/0                                                                                                                            |                                                                                                                                                                                  |
| Rodebaugh et al., 2011    |                  |          |      | x | x |   |   |   |   |  |       | Give doubled - keep tripled            | keep/share (1-10)                           | 1       | 40                    |                           |  |                  | x <sup>[1]</sup>     |                  | depends on the amount given by each player                                                                                         | [1]FickleFriend: Raise the stakes with D in the 20% of last rounds [2]change of player's decision (adding or subtracting 3) in 10% of rounds. required prediction.               |
| Grujić et al., 2010       |                  |          | x(8) |   |   |   |   |   | x |  |       |                                        | blue/yellow                                 |         | 47,58,60              |                           |  |                  |                      |                  | 10/7/0/0                                                                                                                           |                                                                                                                                                                                  |
| Astolfi et al., 2010      |                  |          |      | x |   |   |   | x | x |  |       |                                        | coop/def                                    | 1       | 1                     |                           |  |                  |                      |                  |                                                                                                                                    |                                                                                                                                                                                  |
| Suzuki et al., 2010       |                  |          |      | x | x | x |   |   |   |  |       |                                        | coop/def                                    | 6       | 18                    |                           |  |                  |                      | x <sup>[1]</sup> | 25/20/0/-5                                                                                                                         | [1]C decision based on previous opponents decisions such as P(c)=0.1+0.8*(nC/(nC+nD))                                                                                            |
| Declerck et al., 2010     |                  |          |      | x |   | x |   |   | x |  |       |                                        | L/S                                         | 1       | 1                     |                           |  |                  |                      |                  | 12/8/4/1                                                                                                                           |                                                                                                                                                                                  |
| Stevens et al., 2011      |                  |          |      | x | x |   |   |   |   |  |       | Waitress tip story                     | coop/no coop                                | 5,10,15 | 5,10,15               |                           |  |                  |                      |                  | 5/3/1/0                                                                                                                            |                                                                                                                                                                                  |
| Lane and Gowin, 2009      |                  |          |      | x | x |   |   |   |   |  |       |                                        | A/C                                         | 4       | 100                   |                           |  |                  | x                    |                  | 0.5/0.25/-0.25/0                                                                                                                   |                                                                                                                                                                                  |
| Fischer, 2009             |                  |          |      | x |   |   |   | x | x |  |       |                                        | &/#                                         | 1       | 1                     |                           |  |                  |                      |                  | 20/14/2/0,20/10/5/0                                                                                                                |                                                                                                                                                                                  |
| Kircher et al., 2009      |                  |          |      | x | x | x |   |   |   |  |       |                                        | ?                                           | 3       |                       |                           |  |                  | x                    |                  | 20/10/0/0                                                                                                                          |                                                                                                                                                                                  |
| Haruno and Kawato, 2009   |                  |          |      | x | x | x |   |   |   |  |       |                                        | coop/def                                    | 2       | 18                    | x                         |  |                  | x <sup>[1]</sup>     |                  | 50/30/-20/-30                                                                                                                      | [1]70% probability of C                                                                                                                                                          |
| Krach et al., 2009        |                  |          |      | x | x | x |   |   |   |  |       |                                        | coop/def                                    | 2       | 90                    |                           |  |                  | x                    |                  | 20/10/0/0                                                                                                                          |                                                                                                                                                                                  |
| Lount et al., 2008        |                  |          |      | x |   | x |   |   |   |  |       | Tutorial of cooperation <sup>[1]</sup> | X/Y                                         | 1       | 30                    |                           |  | x <sup>[2]</sup> |                      |                  | 30/24/12/6                                                                                                                         | [1]Murnighan, 1991, pp. 13-27 [2]All C except for D in two rounds                                                                                                                |
| Furlong and Opfer, 2009   |                  |          |      | x |   |   |   | x |   |  |       |                                        | coop/def                                    | 1       | 80                    | x                         |  |                  |                      |                  | 5/3/1/0\$,500/300/100/0c,5/3/1/0c,500/300/100/0\$,5/3/1/0,1005/1003/1001/1000,105/103/101/100,0.05/0.03/0.01/0,0.005/0.003/0.001/0 | depends on the amount given by each player                                                                                                                                       |
| Lönnqvist et al., 2009    |                  |          |      | x |   |   |   | x | x |  |       | Give doubled, Leave doubled            | transfer to other 1-10, transfer to me 1-10 | 2       | 1                     |                           |  |                  |                      |                  |                                                                                                                                    |                                                                                                                                                                                  |
| Chater et al., 2008       |                  |          |      | x |   | x |   |   |   |  |       |                                        | 1/2                                         | 19      | 1                     |                           |  |                  |                      |                  | 21/20/2/1, 0/-31/-34/-35, 36/5/2/1, 11/10/1/0, 0/-5/-6/-11                                                                         |                                                                                                                                                                                  |
| Krach et al., 2008        |                  |          |      | x | x |   |   | x |   |  |       | Prisoner's story                       | coop/def                                    | 4       | 10                    |                           |  |                  | x                    |                  | 20/20/10/0                                                                                                                         |                                                                                                                                                                                  |
| Mokros et al., 2008       |                  |          |      | x | x |   |   |   |   |  |       | Water shortage story                   | coop/def                                    | 1       | 40                    | ft2t                      |  |                  |                      |                  | 8/5/1/0                                                                                                                            |                                                                                                                                                                                  |
| Halevy et al., 2008       | x <sup>[1]</sup> |          |      |   |   |   |   | x |   |  |       |                                        | keep/A/B                                    |         |                       |                           |  |                  |                      |                  |                                                                                                                                    | [1]IPD-MD                                                                                                                                                                        |
| Wolf et al., 2008         | x                |          |      | x |   |   |   | x |   |  |       | matrix                                 | X/Y                                         | 1       | 5                     |                           |  |                  |                      |                  | 10/90/60/30                                                                                                                        |                                                                                                                                                                                  |
| Rilling et al., 2004a     |                  |          |      | x |   | x |   |   |   |  |       |                                        | coop/def                                    | 2       | 20                    | 33%<br>ftt <sup>[1]</sup> |  |                  | x <sup>[2]</sup>     |                  | 3/2/1/0                                                                                                                            | [1]D in first round, [2]Rilling 2002 [ref.no 200]                                                                                                                                |
| Kümmerli et al., 2007     |                  |          |      | x |   |   |   | x |   |  |       |                                        | C/D                                         | 1       | 12                    |                           |  |                  |                      |                  | 400/300/0/-100                                                                                                                     |                                                                                                                                                                                  |
| Hopthrow et al., 2007     | x                |          |      | x |   |   |   | x |   |  |       |                                        | J/P                                         | 1       | 4                     | x                         |  |                  |                      |                  | 60/50/15/10                                                                                                                        |                                                                                                                                                                                  |
| McClure et al., 2007      |                  |          |      | x |   | x |   |   |   |  |       |                                        | coop/no coop                                | 4       | 20                    |                           |  |                  | x <sup>[1]</sup>     |                  | 3/2/1/0                                                                                                                            | [1]McClure 2007 [ref.no 183]                                                                                                                                                     |
| Takemura and Yuki, 2007   | x                |          |      | x |   |   |   | x |   |  |       |                                        | X/Y                                         | 1       | 10                    |                           |  |                  |                      |                  | 11 matrices: 4*n/3*n/2*n/n                                                                                                         |                                                                                                                                                                                  |
| Rilling et al., 2007      |                  |          |      | x | x |   |   |   |   |  |       |                                        | coop/def                                    | 2       | 20                    | 33%<br>ftt                |  |                  |                      |                  | 3/2/1/0                                                                                                                            |                                                                                                                                                                                  |
| Yi et al., 2007           |                  |          |      | x | x |   |   |   |   |  |       |                                        | coop/def                                    | 1       | 60                    | x                         |  |                  |                      |                  | 25/20/10/5                                                                                                                         |                                                                                                                                                                                  |
| Johnson et al., 2004      |                  |          |      | x |   |   |   | x |   |  |       |                                        | X/Y                                         | 1       | 6                     |                           |  |                  |                      |                  | 10/8/3/0,0/-2/-7/-10                                                                                                               |                                                                                                                                                                                  |
| Eek and Gärling, 2006     |                  |          |      | x |   |   |   | x |   |  |       | matrix                                 | A/B                                         | 1       | 1                     |                           |  |                  |                      |                  | 400/200/100/50                                                                                                                     |                                                                                                                                                                                  |
| West et al., 2006         |                  |          |      | x |   |   |   | x |   |  |       |                                        | coop/def                                    | 2       | 7(unknown)            |                           |  |                  |                      |                  | 5/3/2/1                                                                                                                            |                                                                                                                                                                                  |
| Wood et al., 2006         |                  |          |      | x |   | x |   |   |   |  |       | pB                                     | coop/def                                    | 2       | 20                    | x,sft<br>f                |  |                  |                      |                  | 30/20/10/0                                                                                                                         |                                                                                                                                                                                  |
| Yi et al., 2005           |                  |          |      | x | x |   |   |   |   |  |       |                                        | coop/def                                    | 2       | 60                    | x                         |  |                  | x                    |                  | 25/20/10/5                                                                                                                         |                                                                                                                                                                                  |
| Wong and Hong, 2005       |                  |          |      | x |   |   |   | x | x |  |       |                                        | Strategy A/B                                | 5       | 1                     |                           |  |                  |                      |                  |                                                                                                                                    |                                                                                                                                                                                  |
| Insko et al., 2005        | x                |          |      |   | x |   |   |   | x |  |       |                                        | X/Y/Z                                       | 1       | 1                     |                           |  |                  |                      |                  | 360/270/180/90 <sup>[1]</sup>                                                                                                      | [1]withdrawal option with ensured reward of 225 for both players                                                                                                                 |
| Yi and Rachlin, 2004      |                  | x(5)     |      |   |   | x |   |   |   |  |       | matrix                                 | X/Y                                         |         |                       |                           |  | x                |                      | x                | rewards based on how many players chose Y (X:nY*3+7, Y: nY*3)                                                                      |                                                                                                                                                                                  |
| Rilling et al., 2004b     |                  |          |      | x | x | x |   |   |   |  |       | pA                                     | coop/def                                    | 28      | 1                     |                           |  |                  |                      |                  | 6/5/1/0                                                                                                                            |                                                                                                                                                                                  |
| Rotenberg et al., 2004    |                  |          |      | x |   |   |   |   | x |  |       |                                        | green/red light                             | <=62    |                       |                           |  |                  |                      |                  | 15/10/7/5                                                                                                                          |                                                                                                                                                                                  |
| Liberman et al., 2004     |                  |          |      | x |   |   |   |   | x |  |       |                                        | C/D                                         |         | 5,7                   |                           |  |                  |                      |                  | 80/40/0/-20,8/6/-6/-8                                                                                                              |                                                                                                                                                                                  |
| Singer et al., 2004       |                  |          |      | x |   | x |   |   |   |  |       | pA                                     | Give tripled                                | >22     | 4                     |                           |  |                  |                      |                  |                                                                                                                                    |                                                                                                                                                                                  |
| Ketelaar and Au, 2003     |                  |          |      | x |   | x |   |   |   |  |       |                                        | A/B                                         | 8       | 10                    | x                         |  |                  | x <sup>[1,2]</sup>   |                  | 5/3/1/0                                                                                                                            | [1]C in first five rounds and tft afterwards [2]D in first five rounds and tft afterwards                                                                                        |
| Rilling et al., 2002      |                  |          |      | x | x | x |   |   | x |  |       |                                        | coop/def                                    | 3       | 20-23(known, unknown) | stft                      |  |                  | x <sup>[1,2]</sup>   |                  | 3/2/1/0                                                                                                                            | [1]C in first five rounds and tft afterwards [2]Rilling 2002 [ref.no 200]                                                                                                        |
| Wildschut et al., 2002    | x                |          |      |   |   | x |   |   |   |  |       |                                        | X/Y                                         |         | 1                     |                           |  |                  |                      |                  | 500/500/200/200,500/490/110/100,500/400/200/100                                                                                    |                                                                                                                                                                                  |
| Baker and Rachlin, 2002   |                  |          |      | x |   |   |   |   |   |  |       | pB                                     | left/right                                  | 1       | 100                   |                           |  |                  | x <sup>[1,2]</sup>   |                  | 6/5/2/1                                                                                                                            | [1]Tft with changing probability of C based on the cooperational behavior of the player [2]Wsls with changing probability of C based on the cooperational behavior of the player |
| Kiyonari et al., 2000     |                  |          |      | x |   |   |   | x |   |  |       | pA,pB                                  | K/P                                         | 3       | 1                     |                           |  |                  | x                    |                  | 188/1200/600/0                                                                                                                     |                                                                                                                                                                                  |
| Sheldon et al., 2000      |                  | x(2,3,4) |      |   |   |   |   | x | x |  |       |                                        | coop/get ahead                              |         | 1                     |                           |  |                  |                      |                  | rewards based on how many players chose C (C:nC*2, G:nC*2+5)                                                                       |                                                                                                                                                                                  |
| Houston et al., 2000      |                  |          |      | x |   | x |   |   |   |  |       | Arms race                              | 0-6 missiles                                | 1       | 5                     |                           |  |                  | x <sup>[1,2,3]</sup> |                  | 7x7matrix                                                                                                                          | [1]competitive strategy [2]deescalating strategy [3]noncompetitive strategy                                                                                                      |
| Knez and Camerer, 2000    |                  |          |      | x |   |   |   |   | x |  |       |                                        | 1/2/3/4/5/6/7                               | 1       | 5                     |                           |  |                  |                      |                  | 3x3,7x7 matrix                                                                                                                     | required prediction                                                                                                                                                              |
